# Supplementary material for: How well do coverage surveys and programmatically reported mass drug administration coverage match? Results from 214 mass drug administration campaigns in 15 countries, 2008–2017
Source: PubMed Central journal article supplement (PMC10163531; doi:10.1136/bmjgh-2022-011193), 2023-05-04

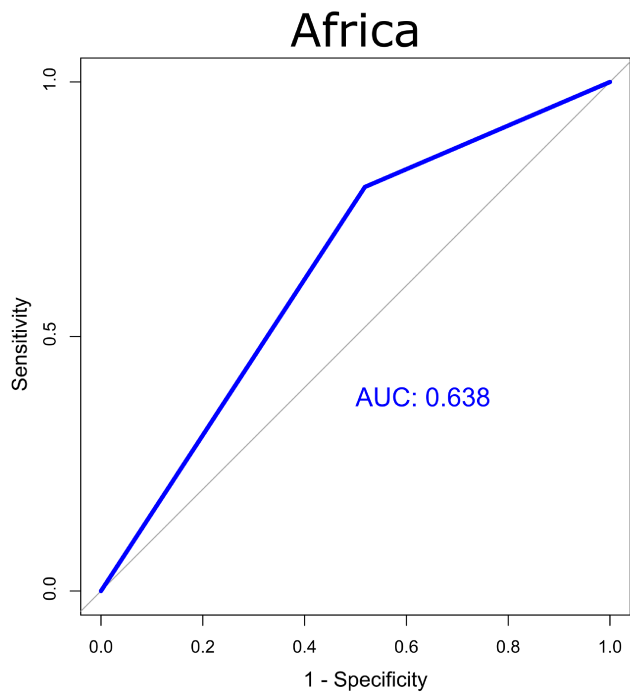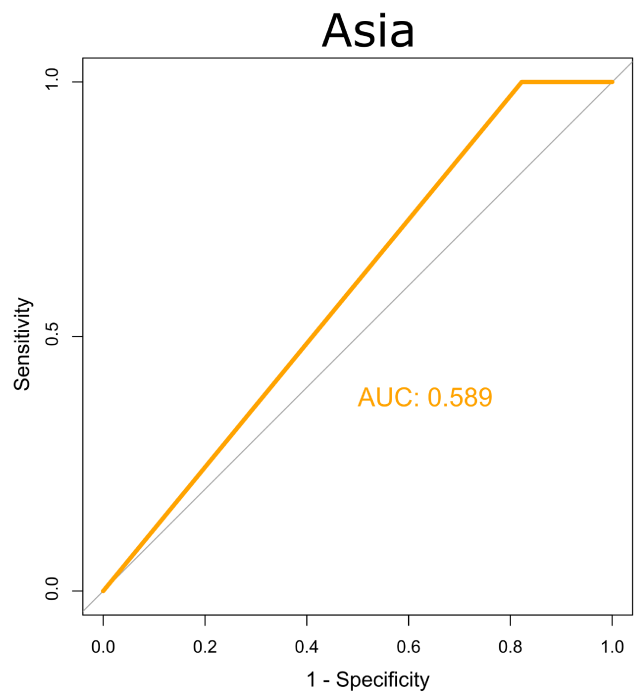

Supplement: bmjgh-2022-011193supp001.pdf [file bmjgh-2022-011193supp001.pdf]
